# Supplementary material for: Joint L1/2-Norm Constraint and Graph-Laplacian PCA Method for Feature Extraction
Source: Biomed Res Int. 2017 Apr 2;2017:5073427. doi: 10.1155/2017/5073427 (PMC5392409; doi:10.1155/2017/5073427)
Supplement: Supplementary file 1 — In the supplementary data, "resultALL_AML_data" are the top 500 genes found by our method on the ALLAML dataset, "find_official_name" is the way to find the official name of these genes and "0.5gLPCA" is the experimental code of our method. [file 5073427.f1.zip]

Archive with 6 entries (3 files):
- Optional Supplementary Materials/Experimental code/
- Optional Supplementary Materials/Experimental code/0.5gLPCA.m
- Optional Supplementary Materials/supplementary data/
- Optional Supplementary Materials/supplementary data/find_official_name.xlsx
- Optional Supplementary Materials/supplementary data/resultALL_AML_data.txt
- Optional Supplementary Materials/
