# Supplementary material for: Joint L1/2-Norm Constraint and Graph-Laplacian PCA Method for Feature Extraction
Source: Biomed Res Int. 2017 Apr 2;2017:5073427. doi: 10.1155/2017/5073427 (PMC5392409; doi:10.1155/2017/5073427)
Supplement: Supplementary file 1 — In the supplementary data, "resultALL_AML_data" are the top 500 genes found by our method on the ALLAML dataset, "find_official_name" is the way to find the official name of these genes and "0.5gLPCA" is the experimental code of our method. [file 5073427.f1.zip › Optional Supplementary Materials/supplementary data/find_official_name.xlsx]

## Sheet: Sheet1
From	To	number = 500		official name
D15057_at	DAD1	M25079_s_at		HBB
K02574_at	pnp	Y00787_s_at		IL8
X05130_s_at	p4hb	M11147_at		FTLP2
M80563_at	S100a4	X00274_at		HLA-DRA
X17042_at	srgn	X00437_s_at		trbC1
M22960_at	CTSA	M69043_at		NFKBIA
V00594_s_at	MT2A	M12886_at		IL23A
M19507_at	MPO	Z84721_cds2_at		hba2
M27783_s_at	ELANE	X57351_s_at		ifitm3
M38690_at	CD9	M13560_s_at		CD74
AFFX-HUMRGE/M10098_5_at	RN18S1	L19779_at		HIST2H2AA3
M30894_at	TARP	M27891_at		Cst3
M30894_at	TRGV9	Y00433_at		GPX1
M30894_at	TRGC1	V00594_s_at		MT2A
X97267_rna1_s_at	Ptprcap	X82240_rna1_at		TCL1A
M27749_at	IGLL1	M28130_rna1_s_at		IL8
M28130_rna1_s_at	IL8	M21119_s_at		LYZ
M21005_at	S100A8	L20941_at		FTHL3
M23178_s_at	CCL3L1	M13792_at		ada
M23178_s_at	CCL3L3	J03077_s_at		PSAP
U46751_at	sqstm1	X76223_s_at		MAL
X03934_at	CD3D	M26311_s_at		S100A9
J04164_at	Ifitm1	AFFX-HUMRGE/M10098_5_at		RN18S1
D30655_at	EIF4A2	X65965_s_at		Sod2
D30655_at	LOC286512	X14008_rna1_f_at		LYZ
J04990_at	CTSG	M19045_f_at		LYZ
M95678_at	PLCB2	X04500_at		IL1B
Z15115_at	TOP2B	J03801_f_at		LYZ
X64072_s_at	ITGB2	X58529_at		IGHV3-11
X00274_at	HLA-DRA	L06797_s_at		CXCR4
M20681_at	SLC2A3	X17042_at		srgn
S73591_at	TXNIP	M63438_s_at		Igkc
M57710_at	LGALS3	M33600_f_at		HLA-DRB4
M96982_at	u2af1	U23852_s_at		LCK
L47738_at	CYFIP2	AFFX-HUMRGE/M10098_3_at		SRP68
L09209_s_at	aplp2	M16279_at		CD99
U23852_s_at	LCK	X03934_at		CD3D
M19645_at	LOC400750	M96326_rna1_at		AZU1
M19645_at	HSPA5	U14603_at		ptp4a2
X64364_at	bsg	HG2915-HT3059_f_at		HLA-E
X57809_s_at	IGLV2-11	M92843_s_at		ZFP36
X57809_s_at	IGLV1-40	HG2917-HT3061_f_at		HLA-E
X57809_s_at	IGLV1-44	D64142_at		H1fx
X57809_s_at	IGL@	U51240_at		LAPTM5
X57809_s_at	iglC1	M19311_s_at		CALM3
X57809_s_at	iglC2	M87789_s_at		IGHG4
X57809_s_at	IGLV3-21	HG3576-HT3779_f_at		#N/A
X57809_s_at	IGLC3	X17093_at		HLA-F
J03473_at	parp1	M33680_at		CD81
X95735_at	ZYX	X68277_at		DUSP1
J03779_at	MME	X62320_at		grn
U50743_at	FXYD2	AFFX-HUMRGE/M10098_M_at		GPR34
X58529_at	IGHV3-11	J04456_at		LGALS1
X58529_at	IGHV3-7	M11722_at		DNTT
X58529_at	IGHG3	J04130_s_at		CCL4
X58529_at	Ighg1	U46751_at		sqstm1
X58529_at	IGH@	U49835_s_at		CHI3L2
X58529_at	IGHM	X59417_at		KIAA0391
X58529_at	ighv4-31	X67951_at		PRDX1
M97796_s_at	ID2	M21186_at		CYBA
Z32765_at	CD36	X03100_cds2_at		hla-dpa1
V00594_at	MT1H	J04990_at		CTSG
X95325_s_at	CSDAP1	U05259_rna1_at		Cd79a
X95325_s_at	csdA	U50743_at		FXYD2
M21119_s_at	LYZ	X51345_at		junb
U40369_rna1_at	Sat1	L33930_s_at		CD24L4
X05908_at	ANXA1	U01317_cds4_at		hbd
D21260_at	CLTC	M19507_at		MPO
J04615_at	SNRPN	M23178_s_at		CCL3L1
J04615_at	SNURF	Z15115_at		TOP2B
X62534_s_at	HMGB2	S71043_rna1_s_at		LOC100126583
S53911_at	CD34	M63138_at		CTSD
HG1614-HT1614_at	Ppp1ca	M57710_at		LGALS3
M13452_s_at	lmna	D00749_s_at		CD7
D90209_at	ATF4	M54915_s_at		Pim1
D90209_at	ATF4C	M91036_rna1_at		HBG1
U52101_at	emp3	L49169_at		fosB
U16306_at	VCAN	L19686_rna1_at		LOC284889
U50648_s_at	EIF2AK2	U20734_s_at		junb
AFFX-HUMRGE/M10098_3_at	SRP68	X12671_rna1_at		LOC644037
D42043_at	Rftn1	V01512_rna1_at		FOS
M37271_s_at	CD7	D88270_at		Vpreb1
X04828_at	gnai2	M92287_at		CCND3
L19686_rna1_at	LOC284889	X13794_rna1_at		ldhb
Y00787_s_at	IL8	X13546_rna1_at		HMGN2
HG110-HT110_s_at	Hnrnpab	L08246_at		mcl1
M31551_s_at	SERPINB2	M57466_s_at		HLA-DPB1
HG2917-HT3061_f_at	HLA-E	M34516_at		IGLL1
M22382_at	HSPD1P6	M57731_s_at		CXCL2
M22382_at	HSPD1P1	HG1862-HT1897_at		#N/A
M22382_at	HSPD1	U22376_cds2_s_at		myb
M22382_at	HSPD1P5	M84526_at		cfd
M22382_at	HSPD1P4	V00563_at		IGHV3-11
U57341_at	NEFL	M21005_at		S100A8
U32944_at	dynll1	U67171_at		SEPW1
L21954_at	tspO	HG1612-HT1612_at		MARCKSL1
L33930_s_at	CD24L4	M23323_s_at		CD3E
L33930_s_at	Cd24	U60644_at		Pld3
U49835_s_at	CHI3L2	J03909_at		ifi30
X04500_at	IL1B	M59807_at		IL32
X04085_rna1_at	cat	U52101_at		emp3
J03909_at	ifi30	X64072_s_at		ITGB2
L49169_at	fosB	HG2788-HT2896_at		S100A6
X70683_at	Sox4	X14046_at		CD37
Z23090_at	Hspb1	D21260_at		CLTC
Z23090_at	HSPBL2	Z21507_at		EEF1D
M11722_at	DNTT	Z69881_at		ATP2A3
U50136_rna1_at	LTC4S	M31627_at		Xbp1
M16750_s_at	Pim1	S53911_at		CD34
M11147_at	FTLP2	X95735_at		ZYX
M11147_at	FTL	X78992_at		ZFP36L2
M69043_at	NFKBIA	L09604_at		PLP2
X60486_at	Hist1h4c	D88422_at		cstA
X60486_at	Hist1h4d	M34996_s_at		LOC100133678
X60486_at	Hist1h4f	X62744_at		HLA-DMA
X60486_at	Hist1h4h	U02020_at		NAMPT
X60486_at	Hist1h4i	X57809_s_at		IGLV2-11
X60486_at	Hist1h4j	M30703_s_at		AREGB
X60486_at	HIST2H4A	X56494_at		LOC652797
X60486_at	Hist1h4a	HG1980-HT2023_at		TUBB2C
X60486_at	HIST2H4B	HG1153-HT1153_at		NME2
X60486_at	Hist1h4b	M72885_rna1_s_at		G0s2
X60486_at	HIST1H4E	Z83821_cds2_at		alaS2
X60486_at	Hist1h4k	D30655_at		EIF4A2
X60486_at	hist1h4l	HG688-HT688_f_at		#N/A
X60486_at	Hist4h4	X77737_at		SLC4A1
D14043_at	CD164	X03068_f_at		HLA-DQB1
D88422_at	cstA	L09229_s_at		ACSL1
X89109_s_at	Coro1a	X70683_at		Sox4
M31523_at	tcf3	M28826_at		CD1B
X14975_at	CD1E	M89957_at		Cd79b
M15395_at	ITGB2	M37033_at		Cd53
U15085_at	HLA-DMB	X04085_rna1_at		cat
X62654_rna1_at	CD63	X62654_rna1_at		CD63
M21259_at	LOC100130109	U30521_at		C5orf13
M21259_at	SNRPEL1	U09937_rna1_s_at		PLAUR
M21259_at	SNRPE	AFFX-M27830_5_at		#N/A
U14603_at	ptp4a2	L09209_s_at		aplp2
U38846_at	cct4	M24485_s_at		GSTP1
J03077_s_at	PSAP	M80563_at		S100a4
M54915_s_at	Pim1	Z68228_s_at		JUP
X67698_at	npc2	X64364_at		bsg
HG987-HT987_at	igfbp7	L21954_at		tspO
Z21507_at	EEF1D	M62831_at		ier2
D45248_at	PSME2	X59871_at		TCF7
M63138_at	CTSD	HG417-HT417_s_at		CTSB
X67951_at	PRDX1	U16306_at		VCAN
L06797_s_at	CXCR4	J03779_at		MME
X13546_rna1_at	HMGN2	J04615_at		SNRPN
X13546_rna1_at	LOC729687	X05908_at		ANXA1
X13546_rna1_at	LOC729505	U90878_at		PDLIM1
X13546_rna1_at	LOC648822	X97267_rna1_s_at		Ptprcap
D13639_at	CCND2	M21624_at		traC
D86967_at	EDEM1	M38690_at		CD9
U89922_s_at	LTB	D13639_at		CCND2
L20941_at	FTHL3	J05614_at		pcnA
L20941_at	FTHL16	M74719_at		TCF4
L20941_at	FTHL20	K01911_at		NPY
L20941_at	FTH1	S73591_at		TXNIP
D00596_at	Tyms	HG4312-HT4582_s_at		GTF3A
U05255_s_at	GYPB	HG2279-HT2375_at		TPI1
U05255_s_at	GYPE	M21388_r_at		IGHV3-11
L76200_at	GUK1	M91438_at		SPINK2
M92287_at	CCND3	M86667_at		NAP1L1
X65965_s_at	Sod2	U89922_s_at		LTB
M23323_s_at	CD3E	M15395_at		ITGB2
M12886_at	IL23A	M62762_at		ATP6V0C
X02317_at	SOD1	J04164_at		Ifitm1
U09770_at	crip1	X01703_at		TUBA1A
M21624_at	traC	D26308_at		BLVRB
M21624_at	TRDV2	M22382_at		HSPD1P6
M21624_at	tra@	X51521_at		EZR
M21624_at	TRAV20	L11672_r_at		ZNF91
M21624_at	TRD@	X59834_at		GLUL
U30827_s_at	Sfrs5	M92934_at		CTGF
HG3494-HT3688_at	CEBPB	M21259_at		LOC100130109
M59465_at	TNFAIP3	M69203_s_at		CCL4
M87789_s_at	IGHG4	U38846_at		cct4
HG1612-HT1612_at	MARCKSL1	U32944_at		dynll1
L08246_at	mcl1	X82200_at		TRIM22
U73824_at	EIF4G2	M34516_r_at		IGLV2-11
U07802_at	ZFP36L2	M58459_at		RPS4Y1
U72649_at	BTG2	X05855_s_at		LOC440926
U01317_cds4_at	hbd	M25280_at		SELL
HG2915-HT3059_f_at	HLA-E	U20998_at		SRP9L1
X54870_at	KLRK1	D61380_at		PARK7
Y00433_at	GPX1	D55654_at		Mdh1
M13792_at	ada	X05130_s_at		p4hb
D87116_at	Map2k3	D83920_at		FCN1
X89399_s_at	arhgdib	D86967_at		EDEM1
M96326_rna1_at	AZU1	HG627-HT5097_s_at		#N/A
U60644_at	Pld3	D00017_at		ANXA2P1
M26311_s_at	S100A9	D00763_at		Psma4
K02405_f_at	HLA-DQB1	M38591_at		S100A10
K02405_f_at	LOC100133583	X74262_at		LOC642954
M34516_r_at	IGLV2-11	J04173_at		pgam1
M34516_r_at	IGLV1-40	S77356_at		atp5o
M34516_r_at	IGLV1-44	M19645_at		LOC400750
M34516_r_at	IGL@	M12959_s_at		traC
M34516_r_at	iglC1	M33195_at		FCER1G
M34516_r_at	iglC2	U72649_at		BTG2
M34516_r_at	IGLV3-21	M16750_s_at		Pim1
M34516_r_at	IGLC3	X53416_at		FLNA
M33882_at	mx1	M29696_at		IL7R
M83667_rna1_s_at	cebpd	X82456_at		LASP1
M24485_s_at	GSTP1	M59465_at		TNFAIP3
HG1872-HT1907_at	CD74	L76200_at		GUK1
X57351_s_at	ifitm3	M31551_s_at		SERPINB2
M91438_at	SPINK2	U56637_at		CAPZA1
M57731_s_at	CXCL2	L12711_s_at		tkt
X53586_rna1_at	itga6	HG1614-HT1614_at		Ppp1ca
HG4312-HT4582_s_at	GTF3A	J03473_at		parp1
X12671_rna1_at	LOC644037	AFFX-M27830_M_at		#N/A
X12671_rna1_at	LOC645691	M97796_s_at		ID2
X12671_rna1_at	HNRPA1L-2	X14975_at		CD1E
X12671_rna1_at	LOC728643	X67698_at		npc2
X12671_rna1_at	HNRNPA1P2	X57351_at		ifitm3
X12671_rna1_at	HNRNPA1	L42379_at		Qsox1
X12671_rna1_at	HNRPA1L3	HG3494-HT3688_at		CEBPB
M16279_at	CD99	D90209_at		ATF4
M94345_at	capG	K02405_f_at		HLA-DQB1
X56494_at	LOC652797	M16336_s_at		Cd2
X56494_at	PKM2	U44975_at		klf6
L12711_s_at	tkt	M16038_at		LYN
M33680_at	CD81	D14043_at		CD164
D83920_at	FCN1	V00594_at		MT1H
M92843_s_at	ZFP36	HG2855-HT2995_at		HSPA8
L20971_at	Pde4b	U15085_at		HLA-DMB
U67171_at	SEPW1	M21904_at		LOC442497
J04456_at	LGALS1	M31523_at		tcf3
M21388_r_at	IGHV3-11	Z23090_at		Hspb1
M21388_r_at	IGHV3-7	HG110-HT110_s_at		Hnrnpab
M21388_r_at	IGHG3	D15057_at		DAD1
M21388_r_at	Ighg1	L19605_at		anxa11
M21388_r_at	IGH@	L47738_at		CYFIP2
M21388_r_at	IGHM	M63904_at		GNA15
M21388_r_at	ighv4-31	M37271_s_at		CD7
D55654_at	Mdh1	U07802_at		ZFP36L2
J02621_s_at	HMGN1	X04828_at		gnai2
J03801_f_at	LYZ	X69433_at		IDH2
J05614_at	pcnA	X93920_at		dusp6
D88270_at	Vpreb1	D86970_at		Myo18a
J04130_s_at	CCL4	X89399_s_at		arhgdib
Z84721_cds2_at	hba2	X05276_at		TPM4
Z84721_cds2_at	HBA1	M83667_rna1_s_at		cebpd
X14046_at	CD37	Z32765_at		CD36
D86970_at	Myo18a	L33842_rna1_at		Impdh2
Z26491_s_at	COMT	J02923_at		LCP1
J02923_at	LCP1	M84371_rna1_s_at		Cd19
M86667_at	NAP1L1	D00596_at		Tyms
Z83821_cds2_at	alaS2	Z11697_at		CD83
L19605_at	anxa11	U05255_s_at		GYPB
X51521_at	EZR	M29064_at		HNRNPA2B1
X51521_at	LOC100129652	U57341_at		NEFL
X69433_at	IDH2	M20681_at		SLC2A3
L11672_r_at	ZNF91	D11086_at		il2rg
M34996_s_at	LOC100133678	M13755_at		ISG15
M34996_s_at	hla-dqa1	U50136_rna1_at		LTC4S
L20298_at	Cbfb	HG987-HT987_at		igfbp7
M30703_s_at	AREGB	K02574_at		pnp
M30703_s_at	AREG	M27783_s_at		ELANE
K01911_at	NPY	X84373_at		NRIP1
M59807_at	IL32	Z26491_s_at		COMT
M25079_s_at	HBB	D45248_at		PSME2
M84526_at	cfd	M27749_at		IGLL1
D00763_at	Psma4	M58603_at		NFKB1
Z68228_s_at	JUP	X60486_at		Hist1h4c
M29696_at	IL7R	U09770_at		crip1
X05276_at	TPM4	X95325_s_at		CSDAP1
X00437_s_at	trbC1	U30827_s_at		Sfrs5
X00437_s_at	Trbv19	J02621_s_at		HMGN1
U02020_at	NAMPT	L20971_at		Pde4b
X74262_at	LOC642954	M33882_at		mx1
X74262_at	RBBP4	HG1872-HT1907_at		CD74
M19311_s_at	CALM3	X53586_rna1_at		itga6
M19311_s_at	CALM2	L20298_at		Cbfb
M19311_s_at	CALM1	M96982_at		u2af1
M72885_rna1_s_at	G0s2	X62535_at		dgkA
M21904_at	LOC442497	M30894_at		TARP
M16038_at	LYN	D85758_at		ERH
X62320_at	grn	L08895_at		MEF2C
M27891_at	Cst3	M22960_at		CTSA
D00017_at	ANXA2P1	U50648_s_at		EIF2AK2
D00017_at	ANXA2P3	M13452_s_at		lmna
D00017_at	ANXA2	X02317_at		SOD1
M92934_at	CTGF	M94345_at		capG
M33600_f_at	HLA-DRB4	D87116_at		Map2k3
M33600_f_at	hla-drb1	D42043_at		Rftn1
M63438_s_at	Igkc	U31384_at		GNG11
M63438_s_at	LOC652493	U73824_at		EIF4G2
M63438_s_at	LOC650405	X07743_at		plek
M63438_s_at	LOC100130100	U29171_at		CSNK1D
X57351_at	ifitm3	M95678_at		PLCB2
U05259_rna1_at	Cd79a	X57579_s_at		INHBA
X76223_s_at	MAL	U17969_at		eif5a
HG2788-HT2896_at	S100A6	X89109_s_at		Coro1a
M62762_at	ATP6V0C	X62534_s_at		HMGB2
M25280_at	SELL	X01060_at		TFRC
D26308_at	BLVRB	U40369_rna1_at		Sat1
U90878_at	PDLIM1	X54870_at		KLRK1
U20734_s_at	junb
M58459_at	RPS4Y1
X84373_at	NRIP1
M74719_at	TCF4
M12959_s_at	traC
M12959_s_at	TRDV2
M12959_s_at	tra@
M12959_s_at	TRAV20
M12959_s_at	TRD@
HG417-HT417_s_at	CTSB
X62535_at	dgkA
X05855_s_at	LOC440926
X05855_s_at	h3f3a
X05855_s_at	LOC644914
X05855_s_at	LOC728914
X05855_s_at	H3f3b
X51345_at	junb
M33195_at	FCER1G
X01703_at	TUBA1A
D64142_at	H1fx
M13560_s_at	CD74
X59834_at	GLUL
M63904_at	GNA15
U44975_at	klf6
M84371_rna1_s_at	Cd19
S71043_rna1_s_at	LOC100126583
U29171_at	CSNK1D
M31627_at	Xbp1
HG1980-HT2023_at	TUBB2C
X57579_s_at	INHBA
M91036_rna1_at	HBG1
M62831_at	ier2
Z11697_at	CD83
M28826_at	CD1B
X93920_at	dusp6
D00749_s_at	CD7
V01512_rna1_at	FOS
U22376_cds2_s_at	myb
X82240_rna1_at	TCL1A
HG2855-HT2995_at	HSPA8
M89957_at	Cd79b
L42379_at	Qsox1
HG1153-HT1153_at	NME2
HG1153-HT1153_at	NME1-NME2
HG1153-HT1153_at	Nme1
X77737_at	SLC4A1
M57466_s_at	HLA-DPB1
J04173_at	pgam1
U51240_at	LAPTM5
U30521_at	C5orf13
HG2279-HT2375_at	TPI1
HG2279-HT2375_at	TPI1P1
L33842_rna1_at	Impdh2
M19045_f_at	LYZ
X53416_at	FLNA
D85758_at	ERH
D61380_at	PARK7
U56637_at	CAPZA1
L08895_at	MEF2C
X78992_at	ZFP36L2
M29064_at	HNRNPA2B1
X13794_rna1_at	ldhb
U31384_at	GNG11
U09937_rna1_s_at	PLAUR
M34516_at	IGLL1
L09229_s_at	ACSL1
X82200_at	TRIM22
U17969_at	eif5a
U17969_at	EIF5AL1
X01060_at	TFRC
S77356_at	atp5o
X14008_rna1_f_at	LYZ
X82456_at	LASP1
M69203_s_at	CCL4
X03068_f_at	HLA-DQB1
X03068_f_at	LOC100133583
X68277_at	DUSP1
M58603_at	NFKB1
X17093_at	HLA-F
V00563_at	IGHV3-11
V00563_at	IGHV3-7
V00563_at	IGHG3
V00563_at	Ighg1
V00563_at	IGH@
V00563_at	IGHM
V00563_at	ighv4-31
M21186_at	CYBA
M37033_at	Cd53
X59871_at	TCF7
Z69881_at	ATP2A3
U20998_at	SRP9L1
U20998_at	srp9
M38591_at	S100A10
D11086_at	il2rg
X62744_at	HLA-DMA
AFFX-HUMRGE/M10098_M_at	GPR34
X07743_at	plek
X03100_cds2_at	hla-dpa1
M16336_s_at	Cd2
L19779_at	HIST2H2AA3
L19779_at	HIST2H2AA4
L09604_at	PLP2
M13755_at	ISG15
X59417_at	KIAA0391
