# Supplementary material for: Joint L1/2-Norm Constraint and Graph-Laplacian PCA Method for Feature Extraction
Source: Biomed Res Int. 2017 Apr 2;2017:5073427. doi: 10.1155/2017/5073427 (PMC5392409; doi:10.1155/2017/5073427)
Supplement: Supplementary file 1 — In the supplementary data, "resultALL_AML_data" are the top 500 genes found by our method on the ALLAML dataset, "find_official_name" is the way to find the official name of these genes and "0.5gLPCA" is the experimental code of our method. [file 5073427.f1.zip › Optional Supplementary Materials/supplementary data/resultALL_AML_data.txt]

number = 500
M25079_s_at
Y00787_s_at
M11147_at
X00274_at
X00437_s_at
M69043_at
M12886_at
Z84721_cds2_at
X57351_s_at
M13560_s_at
L19779_at
M27891_at
Y00433_at
V00594_s_at
X82240_rna1_at
M28130_rna1_s_at
M21119_s_at
L20941_at
M13792_at
J03077_s_at
X76223_s_at
M26311_s_at
AFFX-HUMRGE/M10098_5_at
X65965_s_at
X14008_rna1_f_at
M19045_f_at
X04500_at
J03801_f_at
X58529_at
L06797_s_at
X17042_at
M63438_s_at
M33600_f_at
U23852_s_at
AFFX-HUMRGE/M10098_3_at
M16279_at
X03934_at
M96326_rna1_at
U14603_at
HG2915-HT3059_f_at
M92843_s_at
HG2917-HT3061_f_at
D64142_at
U51240_at
M19311_s_at
M87789_s_at
HG3576-HT3779_f_at
X17093_at
M33680_at
X68277_at
X62320_at
AFFX-HUMRGE/M10098_M_at
J04456_at
M11722_at
J04130_s_at
U46751_at
U49835_s_at
X59417_at
X67951_at
M21186_at
X03100_cds2_at
J04990_at
U05259_rna1_at
U50743_at
X51345_at
L33930_s_at
U01317_cds4_at
M19507_at
M23178_s_at
Z15115_at
S71043_rna1_s_at
M63138_at
M57710_at
D00749_s_at
M54915_s_at
M91036_rna1_at
L49169_at
L19686_rna1_at
U20734_s_at
X12671_rna1_at
V01512_rna1_at
D88270_at
M92287_at
X13794_rna1_at
X13546_rna1_at
L08246_at
M57466_s_at
M34516_at
M57731_s_at
HG1862-HT1897_at
U22376_cds2_s_at
M84526_at
V00563_at
M21005_at
U67171_at
HG1612-HT1612_at
M23323_s_at
U60644_at
J03909_at
M59807_at
U52101_at
X64072_s_at
HG2788-HT2896_at
X14046_at
D21260_at
Z21507_at
Z69881_at
M31627_at
S53911_at
X95735_at
X78992_at
L09604_at
D88422_at
M34996_s_at
X62744_at
U02020_at
X57809_s_at
M30703_s_at
X56494_at
HG1980-HT2023_at
HG1153-HT1153_at
M72885_rna1_s_at
Z83821_cds2_at
D30655_at
HG688-HT688_f_at
X77737_at
X03068_f_at
L09229_s_at
X70683_at
M28826_at
M89957_at
M37033_at
X04085_rna1_at
X62654_rna1_at
U30521_at
U09937_rna1_s_at
AFFX-M27830_5_at
L09209_s_at
M24485_s_at
M80563_at
Z68228_s_at
X64364_at
L21954_at
M62831_at
X59871_at
HG417-HT417_s_at
U16306_at
J03779_at
J04615_at
X05908_at
U90878_at
X97267_rna1_s_at
M21624_at
M38690_at
D13639_at
J05614_at
M74719_at
K01911_at
S73591_at
HG4312-HT4582_s_at
HG2279-HT2375_at
M21388_r_at
M91438_at
M86667_at
U89922_s_at
M15395_at
M62762_at
J04164_at
X01703_at
D26308_at
M22382_at
X51521_at
L11672_r_at
X59834_at
M92934_at
M21259_at
M69203_s_at
U38846_at
U32944_at
X82200_at
M34516_r_at
M58459_at
X05855_s_at
M25280_at
U20998_at
D61380_at
D55654_at
X05130_s_at
D83920_at
D86967_at
HG627-HT5097_s_at
D00017_at
D00763_at
M38591_at
X74262_at
J04173_at
S77356_at
M19645_at
M12959_s_at
M33195_at
U72649_at
M16750_s_at
X53416_at
M29696_at
X82456_at
M59465_at
L76200_at
M31551_s_at
U56637_at
L12711_s_at
HG1614-HT1614_at
J03473_at
AFFX-M27830_M_at
M97796_s_at
X14975_at
X67698_at
X57351_at
L42379_at
HG3494-HT3688_at
D90209_at
K02405_f_at
M16336_s_at
U44975_at
M16038_at
D14043_at
V00594_at
HG2855-HT2995_at
U15085_at
M21904_at
M31523_at
Z23090_at
HG110-HT110_s_at
D15057_at
L19605_at
L47738_at
M63904_at
M37271_s_at
U07802_at
X04828_at
X69433_at
X93920_at
D86970_at
X89399_s_at
X05276_at
M83667_rna1_s_at
Z32765_at
L33842_rna1_at
J02923_at
M84371_rna1_s_at
D00596_at
Z11697_at
U05255_s_at
M29064_at
U57341_at
M20681_at
D11086_at
M13755_at
U50136_rna1_at
HG987-HT987_at
K02574_at
M27783_s_at
X84373_at
Z26491_s_at
D45248_at
M27749_at
M58603_at
X60486_at
U09770_at
X95325_s_at
U30827_s_at
J02621_s_at
L20971_at
M33882_at
HG1872-HT1907_at
X53586_rna1_at
L20298_at
M96982_at
X62535_at
M30894_at
D85758_at
L08895_at
M22960_at
U50648_s_at
M13452_s_at
X02317_at
M94345_at
D87116_at
D42043_at
U31384_at
U73824_at
X07743_at
U29171_at
M95678_at
X57579_s_at
U17969_at
X89109_s_at
X62534_s_at
X01060_at
U40369_rna1_at
X54870_at
